# Supplementary material for: The Impact of Pedestrian Distraction on Safety Behaviours at Controlled and Uncontrolled Crossings
Source: MDPI journal article supplement (doi:10.3390/futuretransp3040065), 2023-10-12
Supplement: s1 [file s1]

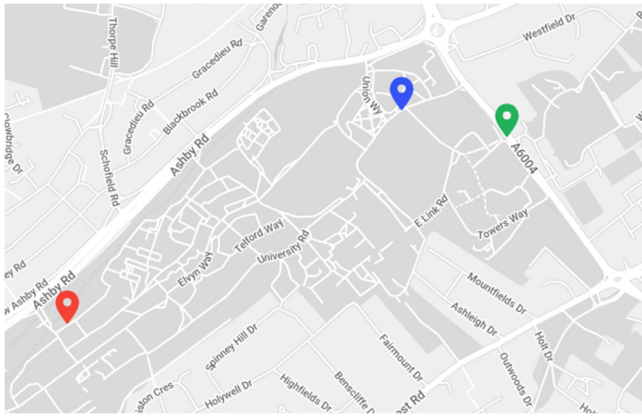

L-R: 1. Campus Zebra Crossing, 3. Campus Uncontrolled Crossing, 2. Campus Traffic Light Crossing

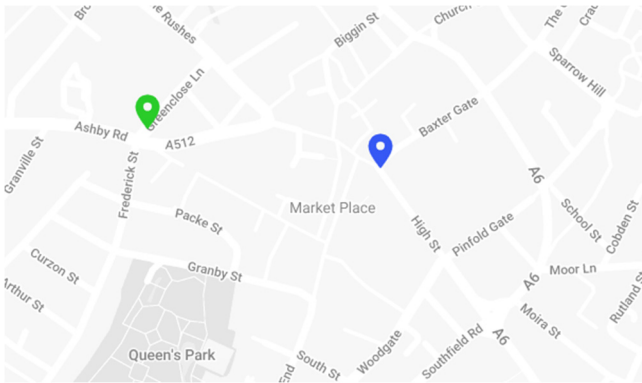

L-R: 5. Town Traffic Light Crossing, 6. Town Uncontrolled Crossing

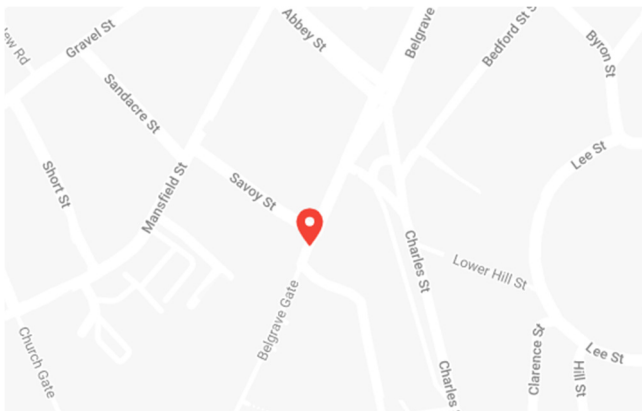

4. Town Zebra Crossing

**Figure S1.** Location map of crossing observation sites. (Top to bottom: Loughborough University, Loughborough Town, Leicester Town).
