# Supplementary material for: The Impact of Pedestrian Distraction on Safety Behaviours at Controlled and Uncontrolled Crossings
Source: MDPI journal article supplement (doi:10.3390/futuretransp3040065), 2023-10-12
Supplement: s1 [file s1]

Archive with 1 entries (1 files):
- futuretransp-2469069-supplementary.pdf
